# Supplementary material for: Renal replacement therapy for children throughout the world: the need for a global registry
Source: PubMed Central journal article supplement (PMC5861175; doi:10.1007/s00467-017-3863-5), 2017-12-22
Supplement: 467_2017_3863_MOESM2_ESM.pdf [file 467_2017_3863_MOESM2_ESM.pdf]

# Renal replacement therapy for children throughout the world: the need for a global registry

---

**Authors:** S. Ploos van Amstel<sup>1</sup>, M. Noordzij<sup>1</sup>, B. Warady<sup>2</sup>, F. Cano<sup>3</sup>, J.C. Craig<sup>4</sup>, J.W. Groothoff<sup>5</sup>, K. Ishikura<sup>6</sup>, A. Neu<sup>7</sup>, H. Safouh<sup>8</sup>, H. Xu<sup>9</sup>, K.J. Jager<sup>1</sup>, F. Schaefer<sup>10</sup>

<sup>1</sup> IPNA Registry, Department of Medical Informatics, Academic Medical Center, Amsterdam Public Health research institute, University of Amsterdam, Amsterdam, The Netherlands

<sup>2</sup> Division of Nephrology, Dialysis and Transplantation Children's Mercy, University of Missouri-Kansas City School of Medicine, Kansas City, United States of America.

<sup>3</sup> Division of Pediatrics, Luis Calvo Mackenna Children's Hospital, Faculty of Medicine, University of Chile, Santiago, Chile

<sup>4</sup> Department of Nephrology, Children's Hospital at Westmead, School of Public Health, University of Sydney, Sydney, Australia

<sup>5</sup> Department of Pediatric Nephrology, Emma Children's Hospital AMC, University of Amsterdam, Amsterdam, The Netherlands

<sup>6</sup> Division of Nephrology and Rheumatology, National Center for Child Health and Development, 2-10-1, Okura, Setagaya-ku, Tokyo 157-8535, Japan

<sup>7</sup> Division of Pediatric Nephrology, The Johns Hopkins University School of Medicine, Baltimore, The United States of America.

<sup>8</sup> Pediatric Nephrology Unit, Faculty of Medicine, Cairo University, Cairo, Egypt

<sup>9</sup> Kidney Development & Pediatric Kidney Disease Research Center, Children's Hospital of Fudan University, Shanghai, China

<sup>10</sup> Division of Pediatric Nephrology, Heidelberg University Center for Pediatrics and Adolescent Medicine, Heidelberg, Germany

**Keywords:** Registry; Epidemiology; Renal replacement therapy; Dialysis; Kidney transplantation.

*Funded by International Pediatric Nephrology Association*

**Word Count:** 3142 (excluding abstract, references, tables and figures)

**Word count abstract:** 220

**Correspondence to:**

Sophie Ploos van Amstel, MD

IPNA Registry, Department of Medical Informatics,  
Academic Medical Center, University of Amsterdam

P.O. Box 22700, 1100 DE Amsterdam, The Netherlands

Telephone +31 20 566 5738; E-mail: [s.ploosvanamstel@amc.uva.nl](mailto:s.ploosvanamstel@amc.uva.nl)

## **SUPPLEMENTARY MATERIAL:**

### **SEARCH STRATEGY:**

Date search: 21<sup>st</sup> November 2016

Active Filter: Humans

- #1 "Search hematuria", 19811
- #2 "Search hemoglobinuria", 4548
- #3 "Search kidney diseases", 426164
- #4 "Search proteinuria", 42016
- #5 "Search (renal[Text Word] OR kidney\*[Text Word])", 656356
- #6 "Search hemodialysis[Text Word]", 49783
- #7 "Search hemofiltrat\*[Text Word]", 5371
- #8 "Search ((CAPD[Text Word] OR CCPD[Text Word] OR APD[Text Word])", 7850
- #9 "Search dialysis[Text Word]", 121956
- #10 "Search glomeruloscler\*[Text Word]", 6942
- #11 "Search glomeruloneph\*[Text Word]", 34639
- #12 "Search (((nephritis[Text Word] OR nephrotic[Text Word]) OR nephrosis[Text Word]) OR nephropath\*[Text Word])", 81220
- #13 "Search proteinuri\*[Text Word]", 31875
- #14 "Search (#1 OR #2 OR #3 OR #4 OR #5 OR #6 OR #7 OR #8 OR #9 OR #10 OR #11 OR #12 OR #13)", 769028
- #15 "Search (registry[Title] OR registries[Title])", 15517
- #16 "Search database[Title]", 10821
- #17 "Search (#15) OR #16", 26172
- #18 "Search ((#17) AND #14) NOT editorial[Publication Type]", 1264
- #19 "Search ((((((Pediatric) OR Pediatric\*) OR pediatric) OR pediatric\*) OR child\*) OR infant) OR adolescent", 3435802
- #20 "Search (#18) AND #19", 380
